# Supplementary material
Source: HighWire-hosted journal article supplement (https://gut.bmj.com/content/gutjnl-2023-330835)
Supplement: inline-supplementary-material-4 [file inline-supplementary-material-4.pdf]

**Supplementary Table 3. Nano LC-MS analysis to characterize the five protein bands identified by silver staining.**

| Band | Position on gel (kDa) | Accession  | Description                                                                                                             | MW (kDa) | Sequest-HT score | Coverage (%) | Function                                              |
|------|-----------------------|------------|-------------------------------------------------------------------------------------------------------------------------|----------|------------------|--------------|-------------------------------------------------------|
| 1    | 140-180               | A0A2A9IP86 | Glutamate synthase large subunit<br>OS=Lactococcus lactis OX=1358<br>GN=BW154_06430 PE=3 SV=1                           | 164.3    | 174.44           | 32           | Pro-tumoural features                                 |
| 2    | 140-180               | N/A        | N/A                                                                                                                     | N/A      | N/A              | N/A          | N/A                                                   |
| 3    | 100-140               | A0A2A9IKZ9 | Valine--tRNA ligase OS=Lactococcus lactis<br>OX=1358 GN=valS PE=3 SV=1                                                  | 101      | 347.59           | 60           | Loading valine onto its specific tRNA                 |
|      |                       | A0A2A9IP05 | Endo-beta-N-acetylglucosaminidase<br>OS=Lactococcus lactis OX=1358<br>GN=BW154_05500 PE=4 SV=1                          | 102.3    | 317.81           | 56           | Processing of free oligosaccharides in the cytosol    |
|      |                       | A0A0V8DM88 | Isoleucine--tRNA ligase OS=Lactococcus lactis subsp. lactis<br>OX=1360 GN=ileS PE=3 SV=1                                | 106.5    | 288.78           | 48           | Catalysing the attachment of isoleucine to tRNA (Ile) |
|      |                       | A0A0V8CY66 | Valine--tRNA ligase OS=Lactococcus lactis subsp. lactis<br>OX=1360 GN=valS PE=3 SV=1                                    | 100.5    | 284.84           | 52           | Loading valine onto its specific tRNA                 |
|      |                       | A0A2N5WA15 | Cytosolic endo-beta-N-acetylglucosaminidase<br>OS=Lactococcus lactis subsp. lactis OX=1360<br>GN=CYU10_002498 PE=4 SV=1 | 102.4    | 278.21           | 54           | Processing of free oligosaccharides in the cytosol    |
|      |                       | A0A0V8BFY1 | Uncharacterized protein OS=Lactococcus lactis subsp. lactis<br>OX=1360 GN=LKF24_2507 PE=4 SV=1                          | 102.4    | 251.49           | 47           | N/A                                                   |

|   |         |                   |                                                                                                         |              |               |           |                                                                                                                 |
|---|---------|-------------------|---------------------------------------------------------------------------------------------------------|--------------|---------------|-----------|-----------------------------------------------------------------------------------------------------------------|
|   |         | A0A0V8DGH2        | DNA-directed RNA polymerase subunit beta OS=Lactococcus lactis subsp. lactis OX=1360 GN=rpoB PE=3 SV=1  | 133.1        | 223.53        | 45        | Polymerisation of ribonucleotides into complementary DNA                                                        |
|   |         | A0A2A9IMI1        | DNA-directed RNA polymerase subunit beta' OS=Lactococcus lactis OX=1358 GN=rpoC PE=3 SV=1               | 134.7        | 219.77        | 44        | Polymerisation of ribonucleotides into complementary DNA                                                        |
|   |         | D2BLI1            | Isoleucine--tRNA ligase OS=Lactococcus lactis subsp. lactis (strain KF147) OX=684738 GN=ileS PE=3 SV=1  | 106.7        | 218.42        | 36        | Catalysing the attachment of isoleucine to tRNA (Ile)                                                           |
|   |         | <b>A0A2A9INL0</b> | <b>Alpha-mannosidase OS=Lactococcus lactis OX=1358 GN=BW154_05470 PE=3 SV=1</b>                         | <b>102.6</b> | <b>182.86</b> | <b>38</b> | <b>Alpha-mannosidase reduces high-mannose N-glycans, malignant progression markers in early-stage CRC</b>       |
|   |         | <b>D2BKE9</b>     | <b>Alpha-mannosidase OS=Lactococcus lactis subsp. lactis (strain KF147) OX=684738 GN=ypdB PE=3 SV=1</b> | <b>102.1</b> | <b>167.28</b> | <b>36</b> | <b>Alpha-mannosidase reduces high-mannose N-glycans, malignant progression markers in early-stage CRC</b>       |
|   |         | A0A2A9IR05        | Pyruvate carboxylase OS=Lactococcus lactis OX=1358 GN=BW154_09950 PE=4 SV=1                             | 126.5        | 143.83        | 35        | Catalysing the HCO <sub>3</sub> <sup>-</sup> and MgATP-dependent carboxylation of pyruvate to form oxaloacetate |
| 4 | 100-140 | A0A2A9IKZ9        | Valine--tRNA ligase OS=Lactococcus lactis OX=1358 GN=valS PE=3 SV=1                                     | 101          | 490.21        | 67        | Loading valine onto its specific tRNA                                                                           |
|   |         | A0A0V8CY66        | Valine--tRNA ligase OS=Lactococcus lactis subsp. lactis OX=1360 GN=valS PE=3 SV=1                       | 100.5        | 425.48        | 59        | Loading valine onto its specific tRNA                                                                           |
|   |         | A0A2A9IMI1        | DNA-directed RNA polymerase subunit beta' OS=Lactococcus lactis OX=1358 GN=rpoC PE=3 SV=1               | 134.7        | 333.97        | 57        | Polymerisation of ribonucleotides into complementary DNA                                                        |

|   |         |            |                                                                                                                   |       |        |    |                                                          |
|---|---------|------------|-------------------------------------------------------------------------------------------------------------------|-------|--------|----|----------------------------------------------------------|
|   |         | A0A0V8DGH2 | DNA-directed RNA polymerase subunit beta OS=Lactococcus lactis subsp. lactis OX=1360 GN=rpoB PE=3 SV=1            | 133.1 | 274.3  | 55 | Polymerisation of ribonucleotides into complementary DNA |
|   |         | A0A7L9L7K3 | Discoidin domain-containing protein OS=Lactococcus lactis OX=1358 GN=HZ322_06980 PE=4 SV=1                        | 102.4 | 239.12 | 51 | Blood coagulation factor                                 |
|   |         | A0A2A9IP05 | Endo-beta-N-acetylglucosaminidase OS=Lactococcus lactis OX=1358 GN=BW154_05500 PE=4 SV=1                          | 102.3 | 234.55 | 52 | Processing of free oligosaccharides in the cytosol       |
|   |         | A0A2N5WA15 | Cytosolic endo-beta-N-acetylglucosaminidase OS=Lactococcus lactis subsp. lactis OX=1360 GN=CYU10_002498 PE=4 SV=1 | 102.4 | 216.68 | 49 | Processing of free oligosaccharides in the cytosol       |
|   |         | A0A0V8DM88 | Isoleucine--tRNA ligase OS=Lactococcus lactis subsp. lactis OX=1360 GN=ileS PE=3 SV=1                             | 106.5 | 216.63 | 46 | Catalysing the attachment of isoleucine to tRNA (Ile)    |
| 5 | 100-140 | A0A2A9IMI1 | DNA-directed RNA polymerase subunit beta' OS=Lactococcus lactis OX=1358 GN=rpoC PE=3 SV=1                         | 134.7 | 260.25 | 51 | Polymerisation of ribonucleotides into complementary DNA |
|   |         | A0A2A9IKZ9 | Valine--tRNA ligase OS=Lactococcus lactis OX=1358 GN=valS PE=3 SV=1                                               | 101   | 240.33 | 48 | Loading valine onto its specific tRNA                    |
|   |         | A0A0V8DGH2 | DNA-directed RNA polymerase subunit beta OS=Lactococcus lactis subsp. lactis OX=1360 GN=rpoB PE=3 SV=1            | 133.1 | 201.54 | 43 | Polymerisation of ribonucleotides into complementary DNA |

|            |                                                                                                                   |       |        |    |                                                       |
|------------|-------------------------------------------------------------------------------------------------------------------|-------|--------|----|-------------------------------------------------------|
| A0A0V8CY66 | Valine--tRNA ligase OS=Lactococcus lactis subsp. lactis OX=1360 GN=valS PE=3 SV=1                                 | 100.5 | 195.46 | 42 | Loading valine onto its specific tRNA                 |
| A0A2A9IP05 | Endo-beta-N-acetylglucosaminidase OS=Lactococcus lactis OX=1358 GN=BW154_05500 PE=4 SV=1                          | 102.3 | 135.45 | 37 | Processing of free oligosaccharides in the cytosol    |
| A0A0V8DM88 | Isoleucine--tRNA ligase OS=Lactococcus lactis subsp. lactis OX=1360 GN=ileS PE=3 SV=1                             | 106.5 | 129.92 | 36 | Catalysing the attachment of isoleucine to tRNA (Ile) |
| A0A2N5WA15 | Cytosolic endo-beta-N-acetylglucosaminidase OS=Lactococcus lactis subsp. lactis OX=1360 GN=CYU10_002498 PE=4 SV=1 | 102.4 | 119.31 | 35 | Processing of free oligosaccharides in the cytosol    |

---

MW, molecular weight.
