# Supplementary material
Source: HighWire-hosted journal article supplement (https://gut.bmj.com/content/gutjnl-2023-330835)
Supplement: inline-supplementary-material-5 [file inline-supplementary-material-5.pdf]

**Supplementary Table 2. Primers for bacteria detection.*****Lactococcus lactis* HkyuLL 10**

|                       | <b>Sequence (5'→3')</b> | <b>Template strand</b> | <b>Length</b> | <b>Start</b> | <b>Stop</b> | <b>Tm</b> | <b>GC%</b> |
|-----------------------|-------------------------|------------------------|---------------|--------------|-------------|-----------|------------|
| <b>Forward primer</b> | CCAGCCCATTGAACTTCCCT    | Plus                   | 20            | 218          | 237         | 59.96     | 55.00      |
| <b>Reverse primer</b> | TCATCTGTTGTCCTCGCATTCT  | Minus                  | 22            | 502          | 481         | 59.77     | 45.45      |
| <b>Product length</b> | 285                     |                        |               |              |             |           |            |

***Escherichia coli* MG1655**

|                       | <b>Sequence (5'→3')</b> | <b>Template strand</b> | <b>Length</b> | <b>Start</b> | <b>Stop</b> | <b>Tm</b> | <b>GC%</b> |
|-----------------------|-------------------------|------------------------|---------------|--------------|-------------|-----------|------------|
| <b>Forward primer</b> | TCGCACTTTCCCTGGTTCTG    | Plus                   | 20            | 5259         | 5278        | 60.25     | 55.00      |
| <b>Reverse primer</b> | ACCTCCATCCCAGTAATAGCCA  | Minus                  | 22            | 5380         | 5359        | 60.36     | 50.00      |
| <b>Product length</b> | 122                     |                        |               |              |             |           |            |
