# Supplementary material
Source: HighWire-hosted journal article supplement (https://gut.bmj.com/content/gutjnl-2023-330835)
Supplement: inline-supplementary-material-7 [file inline-supplementary-material-7.pdf]

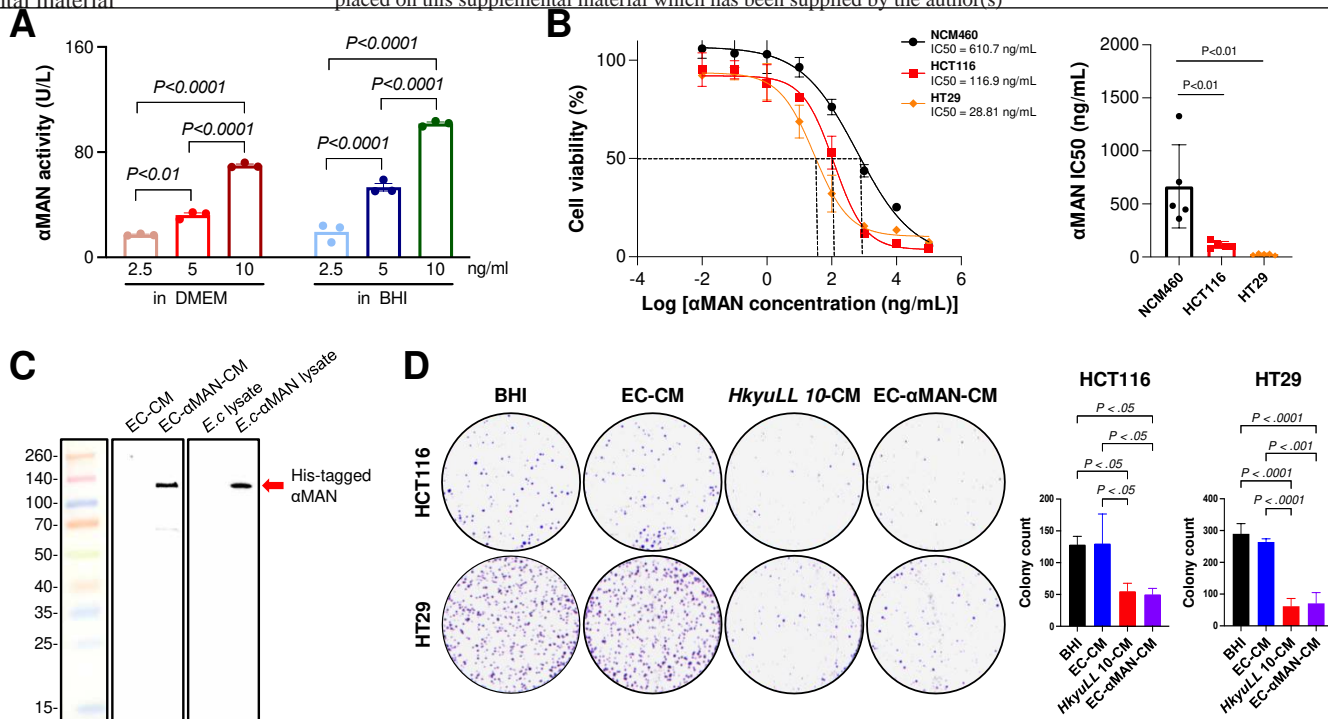

**Supplementary Figure 4. Alpha-mannosidase inhibits growth of CRC cells. (A)** Activity of  $\alpha$ MAN in cell culture medium (DMEM) and bacteria culture broth (BHI). **(B)** IC<sub>50</sub> of half-maximal inhibitory concentration of  $\alpha$ MAN in CRC cells (HCT116, HT29) and normal cells (NCM460). **(C)** Construction of a mutant *E. coli* strain  $\alpha$ MAN expression.  $\alpha$ MAN was present in the conditioned medium and lysate of mutant but not wildtype *E. coli*. **(D)** Colony formation of CRC cells under treatment of 5% bacterial conditioned medium (> 100kDa). *E. coli*; EC- $\alpha$ MAN-CM,  $\alpha$ MAN-expressing *E. coli* conditioned medium.
