# Supplementary material
Source: HighWire-hosted journal article supplement (https://gut.bmj.com/content/gutjnl-2023-330835)
Supplement: inline-supplementary-material-9 [file inline-supplementary-material-9.pdf]

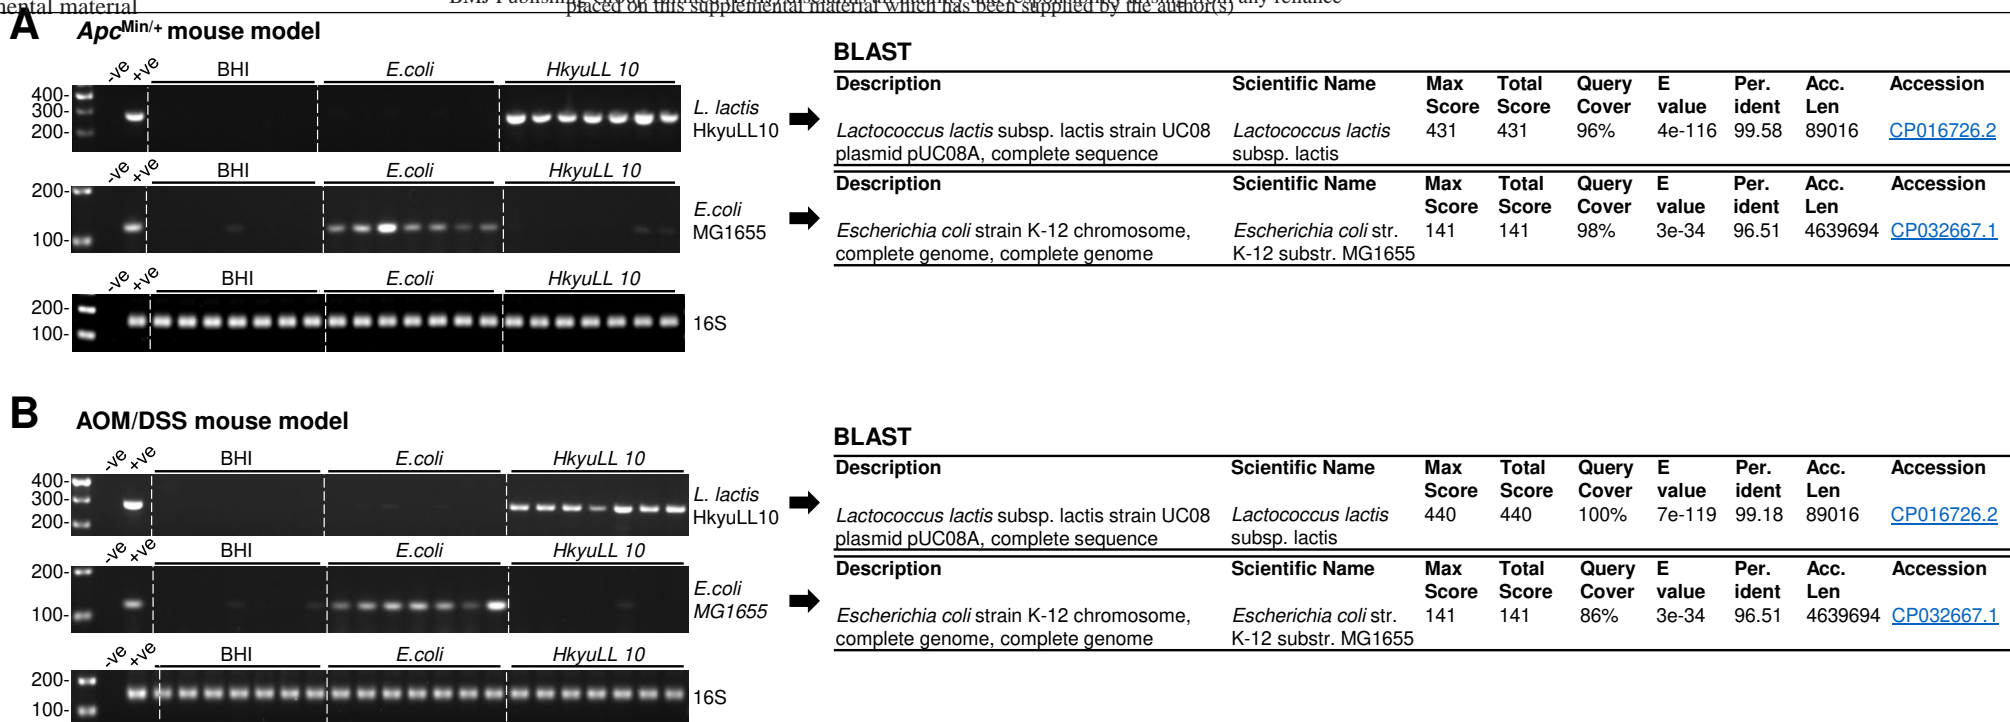

**Supplementary Figure 2. Bacteria detection in gavaged mice. (A, B)** DNA gel electrophoresis (left) and BLAST results from Sanger sequencing analysis (right) on faecal samples of *Apc<sup>Min/+</sup>* (A) or AOM/DSS-treated mice (B).
